# Supplementary material for: Genotypic Diversity Effects on the Performance of Taraxacum officinale Populations Increase with Time and Environmental Favorability
Source: PubMed Central journal article supplement (PMC3277588; doi:10.1371/journal.pone.0030314), 2012-02-10

**Figure S1. Comparison of genotypic performance in mixture versus monoculture over time.** Dandelion genotype mixture (plot genotypic richness > 1) versus monoculture (plot genotypic richness =1) means  $\pm$  1 SE for leaf area ( $\text{cm}^2$ ) at each of six measurement dates (N = 1800). Means are shown separately for (A) the fallow field and (B) the mowed lawn. Leaf area measurements were log-transformed before the genotypic means were calculated. The dashed line indicates a 1:1 relationship. Numbers refer to specific genotypes.

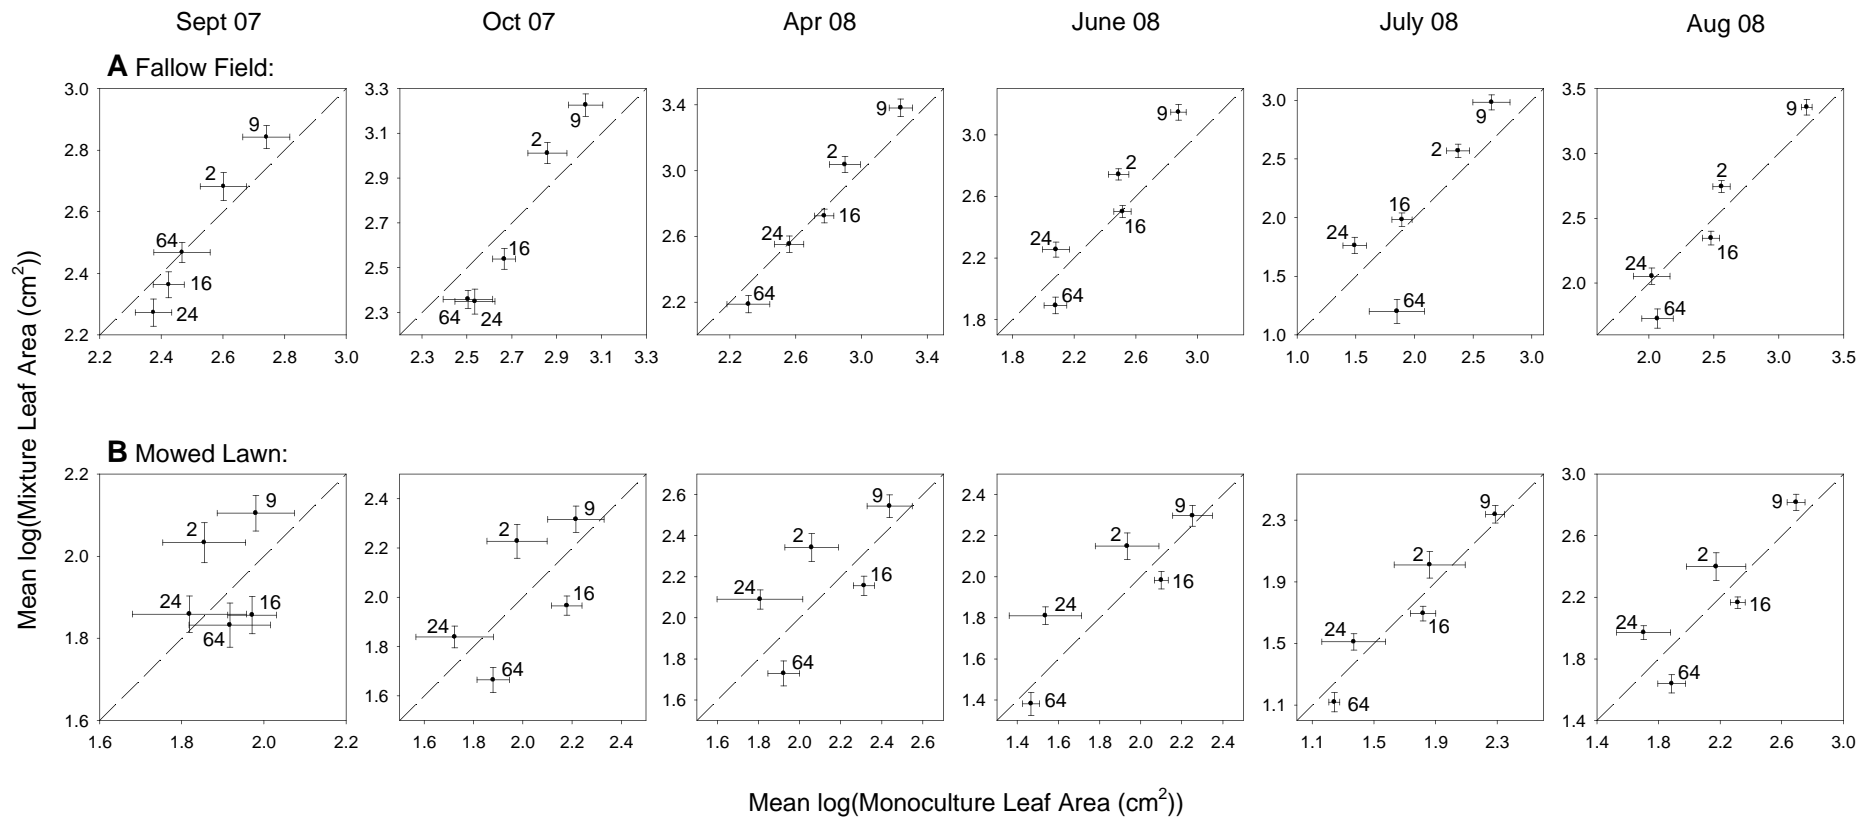

Supplement: pone.0030314.s001.pdf [file pone.0030314.s001.pdf]
