# Supplementary material for: Genotypic Diversity Effects on the Performance of Taraxacum officinale Populations Increase with Time and Environmental Favorability
Source: PubMed Central journal article supplement (PMC3277588; doi:10.1371/journal.pone.0030314), 2012-02-10

**Figure S2. Maximum number of emerged seedlings by genotype and environment.**

Mean of the maximum number of emerged seedlings (minus the number of emerged seedlings in a control)  $\pm$  1 SE for each genotype (genotypes are designated by numbers). Means are shown separately for (A) the fallow field and (B) the mowed lawn. There was a significant genotype-by-environment interaction (Mixed Model with Satterthwaite correction,  $p = 0.02$ ), and significant main effects of genotype ( $p = 0.01$ ) and environment ( $p = 0.004$ ). Different letters indicate significant differences within an environment (Tukey-Kramer test,  $p < 0.05$ ).

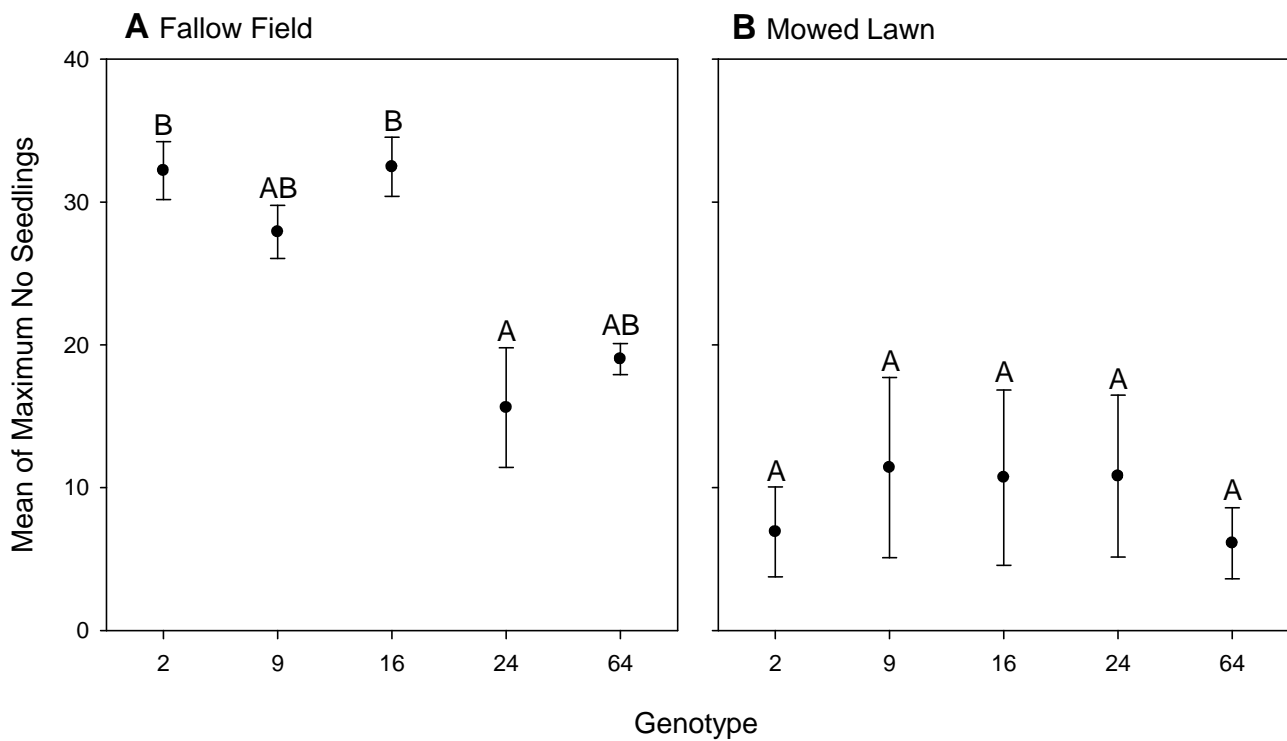

Supplement: pone.0030314.s002.pdf [file pone.0030314.s002.pdf]
