# Supplementary material for: Genotypic Diversity Effects on the Performance of Taraxacum officinale Populations Increase with Time and Environmental Favorability
Source: PubMed Central journal article supplement (PMC3277588; doi:10.1371/journal.pone.0030314), 2012-02-10
Supplement: pone.0030314.s003.pdf [file pone.0030314.s003.pdf]

**Table S1.** Description of diversity treatments as completed. The numbers in the composition column refer to specific genotypes.

| Genotypic Richness | Genotypic Composition | No Replicates |
|--------------------|-----------------------|---------------|
| 1                  | 2                     | 5             |
|                    | 9                     | 5             |
|                    | 16                    | 15            |
|                    | 24                    | 5             |
|                    | 64                    | 5             |
| 2 <sup>a</sup>     | 2+16                  | 10            |
|                    | 9+24                  | 5             |
|                    | 9+64                  | 5             |
|                    | 24+64                 | 5             |
| 4                  | 2+9+16+24             | 5             |
|                    | 2+9+16+64             | 5             |
|                    | 2+16+24+64            | 5             |
|                    | 9+16+24+64            | 5             |
| 5                  | 2+9+16+24+64          | 10            |

<sup>a</sup>For treatments including two or four genotypes, genotypes were selected randomly with the constraint that each genotype be represented equally at each richness level.
