# Supplementary material for: Genotypic Diversity Effects on the Performance of Taraxacum officinale Populations Increase with Time and Environmental Favorability
Source: PubMed Central journal article supplement (PMC3277588; doi:10.1371/journal.pone.0030314), 2012-02-10
Supplement: pone.0030314.s004.pdf [file pone.0030314.s004.pdf]

**Table S2.** The effects of environment, diversity (i.e. genotypic richness), and their interaction, as well as a covariate, prin1, the first axis of a principal components analysis that represented spatial variability in the edaphic environment, on multiple measures of population performance (summed across all plants in a plot): leaf area (cm<sup>2</sup>), seed number, seed-head number and aboveground biomass. Separate analyses of covariance (ANCOVAs) were performed for each variable and date.

| Variable                          | Date         | Transformation         | Effect                  | F                       | df     | p               |                 |
|-----------------------------------|--------------|------------------------|-------------------------|-------------------------|--------|-----------------|-----------------|
| Plot Leaf Area (cm <sup>2</sup> ) | Sept 07      | pwr(0.16) <sup>a</sup> | prin1                   | 64.66                   | 1, 173 | < <b>0.0001</b> |                 |
|                                   |              |                        | environment             | 321.39                  | 1, 173 | < <b>0.0001</b> |                 |
|                                   |              |                        | diversity               | 2.98                    | 2, 173 | 0.0534          |                 |
|                                   |              |                        | environment x diversity | 0.96                    | 2, 173 | 0.3856          |                 |
|                                   | Oct 07       | pwr(0.11)              | prin1                   | 59.52                   | 1, 173 | < <b>0.0001</b> |                 |
|                                   |              |                        | environment             | 310.00                  | 1, 173 | < <b>0.0001</b> |                 |
|                                   |              |                        | diversity               | 3.52                    | 2, 173 | <b>0.0318</b>   |                 |
|                                   |              |                        | environment x diversity | 1.72                    | 2, 173 | 0.1816          |                 |
|                                   | Apr 08       | pwr(0.10)              | prin1                   | 37.70                   | 1, 173 | < <b>0.0001</b> |                 |
|                                   |              |                        | environment             | 175.11                  | 1, 173 | < <b>0.0001</b> |                 |
|                                   |              |                        | diversity               | 4.50                    | 2, 173 | <b>0.0124</b>   |                 |
|                                   |              |                        | environment x diversity | 0.97                    | 2, 173 | 0.3816          |                 |
|                                   | June 08      | pwr(0.16)              | prin1                   | 24.45                   | 1, 173 | < <b>0.0001</b> |                 |
|                                   |              |                        | environment             | 174.81                  | 1, 173 | < <b>0.0001</b> |                 |
|                                   |              |                        | diversity               | 8.88                    | 2, 173 | <b>0.0002</b>   |                 |
|                                   |              |                        | environment x diversity | 2.45                    | 2, 173 | 0.0895          |                 |
|                                   | July 08      | pwr(0.18)              | prin1                   | 39.47                   | 1, 173 | < <b>0.0001</b> |                 |
|                                   |              |                        | environment             | 42.12                   | 1, 173 | < <b>0.0001</b> |                 |
|                                   |              |                        | diversity               | 13.07                   | 2, 173 | < <b>0.0001</b> |                 |
|                                   |              |                        | environment x diversity | 3.41                    | 2, 173 | <b>0.0352</b>   |                 |
|                                   | Aug 08       | pwr(0.13)              | prin1                   | 20.52                   | 1, 173 | < <b>0.0001</b> |                 |
|                                   |              |                        | environment             | 42.02                   | 1, 173 | < <b>0.0001</b> |                 |
|                                   |              |                        | diversity               | 9.70                    | 2, 173 | <b>0.0001</b>   |                 |
|                                   |              |                        | environment x diversity | 1.36                    | 2, 173 | 0.2587          |                 |
|                                   | Plot Seed No | Total 2007 + 2008      | sqrt                    | prin1                   | 37.85  | 1, 173          | < <b>0.0001</b> |
|                                   |              |                        |                         | environment             | 308.07 | 1, 173          | < <b>0.0001</b> |
|                                   |              |                        |                         | diversity               | 7.68   | 2, 173          | <b>0.0006</b>   |
|                                   |              |                        |                         | environment x diversity | 1.51   | 2, 173          | 0.2229          |

**Table S2** (continued)

|                   |                   |           |                         |       |        |                   |
|-------------------|-------------------|-----------|-------------------------|-------|--------|-------------------|
| Plot Seed Head No | Total 2009 + 2010 | pwr(0.31) | prin1                   | 15.19 | 1, 173 | <b>0.0008</b>     |
|                   |                   |           | environment             | 96.44 | 1, 173 | <b>&lt;0.0001</b> |
|                   |                   |           | diversity               | 11.60 | 2, 173 | <b>0.0004</b>     |
|                   |                   |           | environment x diversity | 2.70  | 2, 173 | 0.1470            |
| Plot Biomass      | May 2010          | pwr(0.38) | prin1                   | 11.69 | 1, 173 | <b>&lt;0.0001</b> |
|                   |                   |           | environment             | 43.98 | 1, 173 | <b>&lt;0.0001</b> |
|                   |                   |           | diversity               | 3.58  | 2, 173 | <b>0.0004</b>     |
|                   |                   |           | environment x diversity | 0.63  | 2, 173 | 0.2376            |

<sup>a</sup>Pwr(x) indicates that the plot productivities were raised to the power of x.
