# Supplementary material for: Genotypic Diversity Effects on the Performance of Taraxacum officinale Populations Increase with Time and Environmental Favorability
Source: PubMed Central journal article supplement (PMC3277588; doi:10.1371/journal.pone.0030314), 2012-02-10
Supplement: pone.0030314.s005.pdf [file pone.0030314.s005.pdf]

**Table S3.** Species recorded in the 2007 census of plot composition. Abundance classes were used for the principal components analysis.

|                                |
|--------------------------------|
| <i>Acer</i> sp.                |
| <i>Achillea millefolium</i>    |
| <i>Aphanes arvensis</i>        |
| <i>Cerastium fontanum</i>      |
| <i>Erodium cicutarium</i>      |
| <i>Geranium molle</i>          |
| <i>Geranium dissectum</i>      |
| <i>Hypochaeris radicata</i>    |
| <i>Lamium purpureum</i>        |
| <i>Medicago lupulina</i>       |
| <i>Montia linearis</i>         |
| <i>Myosotis discolor</i>       |
| <i>Plantago lanceolata</i>     |
| Poaceae <sup>a</sup>           |
| <i>Ranunculus repens</i>       |
| <i>Rhynchospora squarrosus</i> |
| <i>Rumex acetosella</i>        |
| <i>Rumex obtusifolius</i>      |
| <i>Sonchus asper</i>           |
| <i>Spergularia rubra</i>       |
| <i>Stellaria media</i>         |
| <i>Taraxacum officinale</i>    |
| <i>Trifolium</i> spp.          |
| <i>Veronica arvensis</i>       |

<sup>a</sup>Grass species were not discernable at this time of the year (June 2007).
