# Supplementary material for: Genotypic Diversity Effects on the Performance of Taraxacum officinale Populations Increase with Time and Environmental Favorability
Source: PubMed Central journal article supplement (PMC3277588; doi:10.1371/journal.pone.0030314), 2012-02-10
Supplement: pone.0030314.s006.pdf [file pone.0030314.s006.pdf]

**Table S4.** Results of one-sample tests to determine whether mean net biodiversity, complementarity, or selection effects differed from zero. T-tests were used for net biodiversity and complementarity effects, and sign-tests for selection effects. Significant tests ( $p < 0.05$ ) are indicated in bold.

| Variable                     | Date        | Effect          | Fallow Field           |                    | Mowed Lawn         |               |               |
|------------------------------|-------------|-----------------|------------------------|--------------------|--------------------|---------------|---------------|
|                              |             |                 | Transformation         | p                  | Transformation     | p             |               |
| Leaf Area (cm <sup>2</sup> ) | Sept 07     | Net Effect      | sqrt                   | <b>0.0497</b>      | sqrt               | 0.8432        |               |
|                              |             | Complementarity | pwr(0.75) <sup>a</sup> | 0.1437             | sqrt               | 0.6355        |               |
|                              |             | Selection       | none                   | <b>0.0027</b>      | none               | <b>0.0145</b> |               |
|                              | Oct 07      | Net Effect      | sqrt                   | <b>0.0007</b>      | sqrt               | 0.7850        |               |
|                              |             | Complementarity | pwr(0.75)              | 0.1201             | sqrt               | 0.4378        |               |
|                              |             | Selection       | none                   | <b>&lt; 0.0001</b> | none               | <b>0.0065</b> |               |
|                              | Apr 08      | Net Effect      | sqrt                   | <b>0.0038</b>      | sqrt               | 0.6467        |               |
|                              |             | Complementarity | pwr(0.75)              | 0.0531             | sqrt               | 0.0841        |               |
|                              |             | Selection       | none                   | <b>&lt; 0.0001</b> | none               | <b>0.0065</b> |               |
|                              | June 08     | Net Effect      | sqrt                   | <b>&lt; 0.0001</b> | sqrt               | 0.5660        |               |
|                              |             | Complementarity | pwr(0.75)              | <b>&lt; 0.0001</b> | sqrt               | 0.1458        |               |
|                              |             | Selection       | none                   | <b>0.0300</b>      | none               | <b>0.0300</b> |               |
|                              | July 08     | Net Effect      | sqrt                   | <b>0.0001</b>      | sqrt               | 0.8268        |               |
|                              |             | Complementarity | pwr(0.75)              | <b>0.0003</b>      | sqrt               | 0.6675        |               |
|                              |             | Selection       | none                   | 0.1048             | none               | 0.5900        |               |
|                              | Aug 08      | Net Effect      | sqrt                   | <b>0.0005</b>      | sqrt               | 0.1135        |               |
|                              |             | Complementarity | pwr(0.75)              | 0.3152             | sqrt               | 0.1365        |               |
|                              |             | Selection       | none                   | <b>0.0004</b>      | none               | 0.5900        |               |
|                              | Seed Number | Total           | Net Effect             | none               | <b>&lt; 0.0001</b> | sqrt          | 0.2096        |
|                              |             |                 | Complementarity        | none               | 0.0646             | pwr(0.75)     | <b>0.0063</b> |
|                              |             |                 | Selection <sup>b</sup> | none               | <b>&lt; 0.0001</b> | none          | 0.2806        |

<sup>a</sup>Pwr(x) indicates that the data were raised to the power of x.

<sup>b</sup>A t-test was used in the fallow field.
