# Supplementary material for: Genotypic Diversity Effects on the Performance of Taraxacum officinale Populations Increase with Time and Environmental Favorability
Source: PubMed Central journal article supplement (PMC3277588; doi:10.1371/journal.pone.0030314), 2012-02-10
Supplement: pone.0030314.s007.pdf [file pone.0030314.s007.pdf]

**Table S5.** Coefficients of variation (CVs) among genotypic means calculated separately for each environment (Fallow Field vs. Mowed Lawn), and in monoculture versus mixture, shown for both leaf area (cm<sup>2</sup>) and seed number variables.

| Variable                     | Date    | Fallow Field |         | Mowed Lawn  |         |
|------------------------------|---------|--------------|---------|-------------|---------|
|                              |         | Monoculture  | Mixture | Monoculture | Mixture |
| Leaf Area (cm <sup>2</sup> ) | Sept 07 | 0.36         | 0.56    | 0.14        | 0.29    |
|                              | Oct 07  | 0.52         | 0.93    | 0.45        | 0.64    |
|                              | Apr 08  | 0.77         | 1.01    | 0.56        | 0.65    |
|                              | June 08 | 0.77         | 1.09    | 0.68        | 0.66    |
|                              | July 08 | 1.01         | 1.28    | 0.81        | 0.98    |
|                              | Aug 08  | 1.22         | 1.44    | 0.82        | 1.02    |
| Seed number                  | Total   | 0.48         | 1.00    | 0.59        | 0.78    |
